# Supplementary material for: Vanadium oxide as an electron buffer to stabilize palladium for electrocatalytic hydrodechlorination
Source: Royal Society of Chemistry journal article supplement (doi:10.1039/d4ta04267k), 2024-01-01
Supplement: d4ta04267k1.pdf [file d4ta04267k1.pdf]

Supporting Information for  
Vanadium oxide as an electron buffer to stabilize palladium for electrocatalytic  
hydrodechlorination

Meiqin Shi,<sup>a</sup> Yifei Ren,<sup>a</sup> Shuyuan Xu,<sup>a</sup> Xiaofeng Xu,<sup>a</sup> Fanfei Sun<sup>\*bc</sup> and Yuanbin She<sup>\*a</sup>

<sup>a</sup> College of Chemical Engineering, Zhejiang University of Technology, Hangzhou 310032, Zhejiang, People's Republic of China.

<sup>b</sup> Shanghai Synchrotron Radiation Facility, Shanghai Advanced Research Institute, Chinese Academy of Sciences, Shanghai 201204, People's Republic of China.

<sup>c</sup> Shanghai Institute of Applied Physics, Chinese Academy of Sciences, Shanghai 201204, People's Republic of China

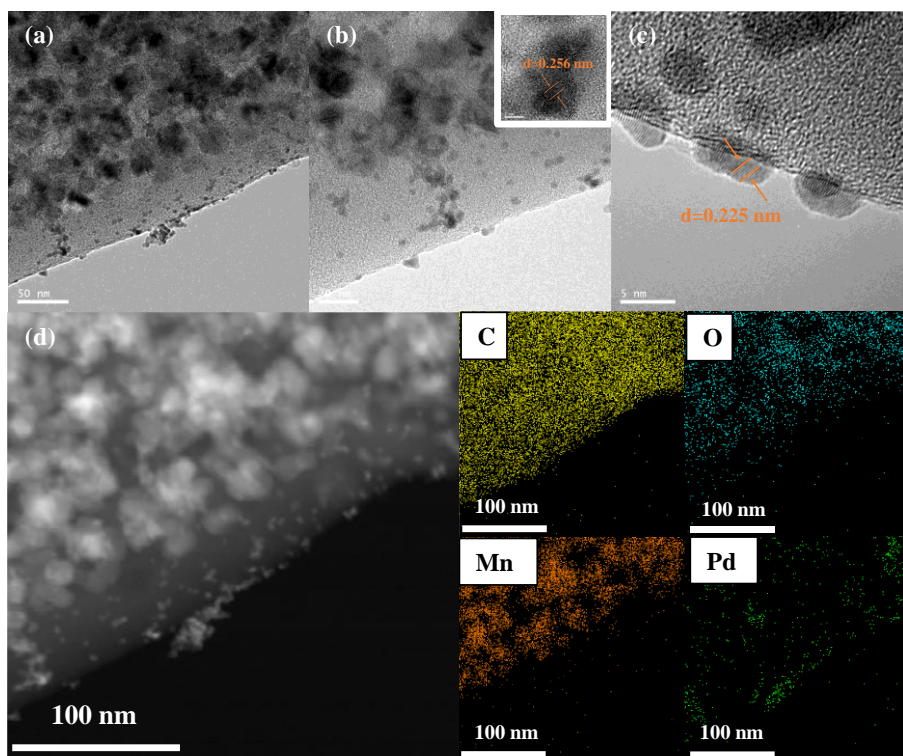

**Fig. S1** Characterization images of sample Pd/MnO/C-800 (a, b) TEM, (c) HRTEM, (d) TEM-EDX mapping

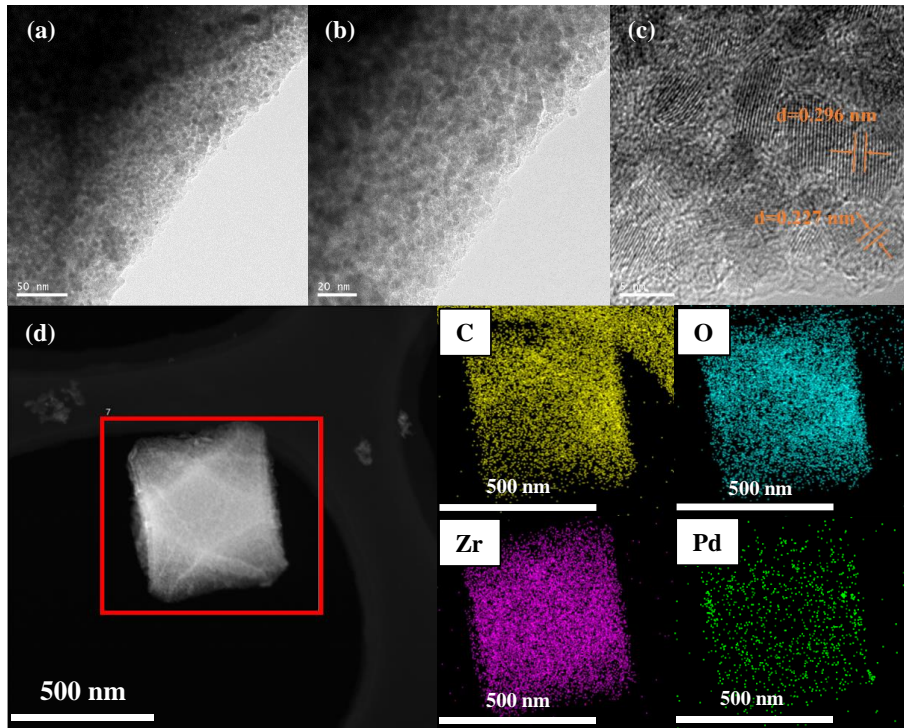

**Fig. S2** Characterization images of sample Pd/ZrO<sub>2</sub>/C-800 (a, b) TEM, (c) HRTEM, (d) TEM-EDX mapping

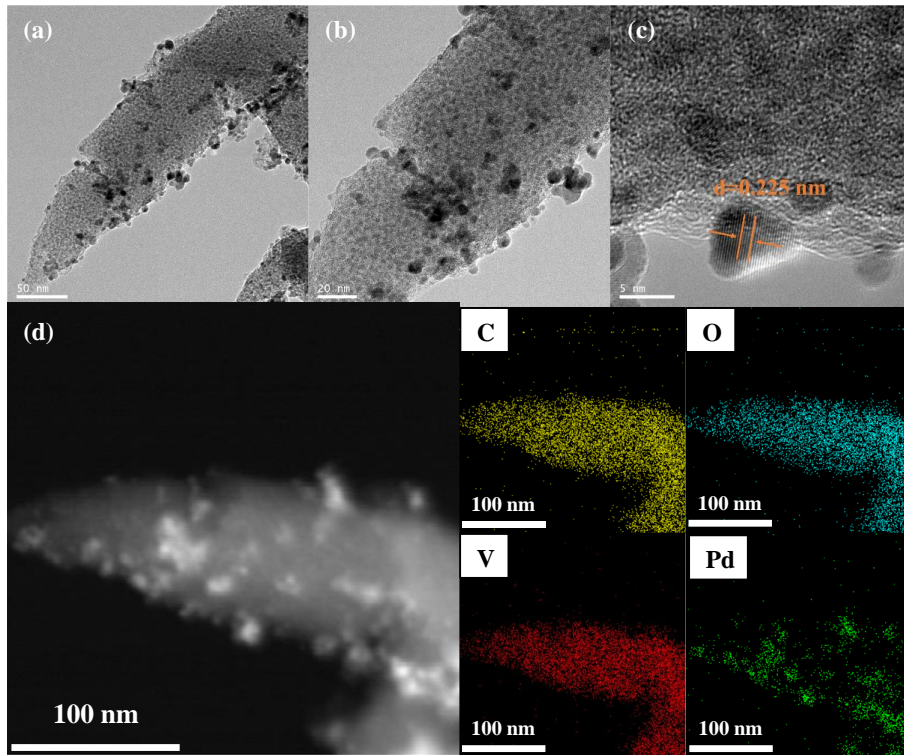

**Fig. S3** Characterization images of sample Pd/VO<sub>x</sub>/C-600 (a, b) TEM, (c) HRTEM, (d) TEM-EDX mapping

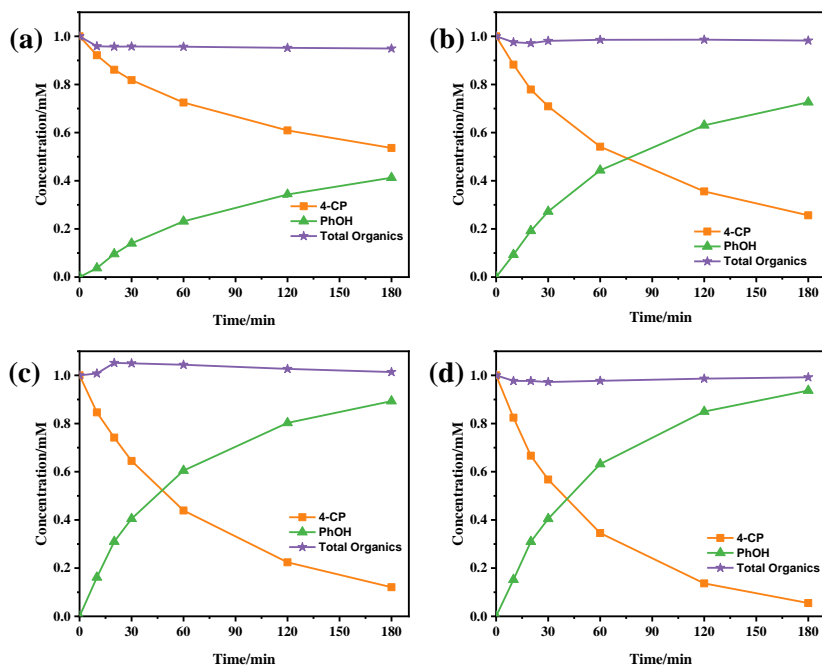

**Fig. S4** Electrocatalytic hydrodechlorination product selectivity of (a) Pd/MnO/C-800, (b) Pd/ZrO<sub>2</sub>/C-800, (c) Pd/VO<sub>x</sub>/C-600 and (d) commercial Pd/C. Reaction conditions: T = 30 °C, electrolyte: 30 mL PBS solution, concentration of 4-CP = 1 mM, N<sub>2</sub> atmosphere

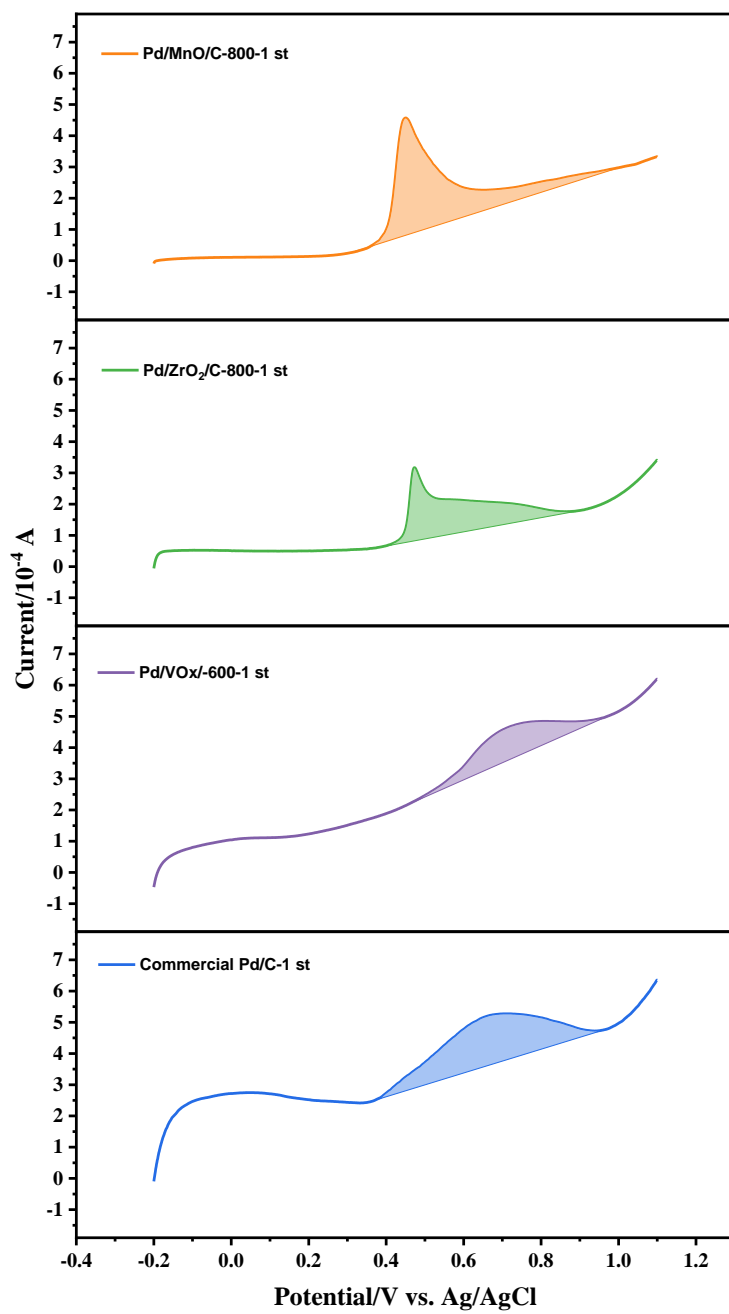

**Fig. S5** CO stripping curves on Pd/MnO/C-800, Pd/ZrO<sub>2</sub>/C-800, Pd/VO<sub>x</sub>/C-600 and commercial Pd/C electrodes tested in 30 mL PBS solution (pH = 7)

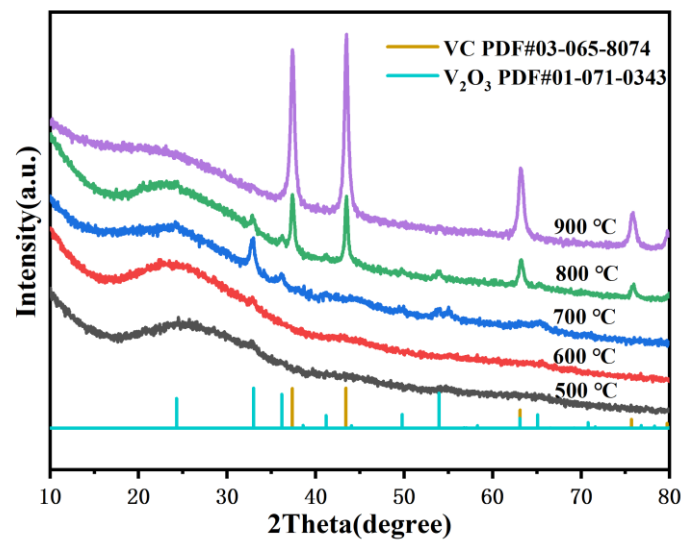

**Fig. S6** XRD analysis for the V-MOF (COMOC-3) after pyrolysis at 500 - 900 °C

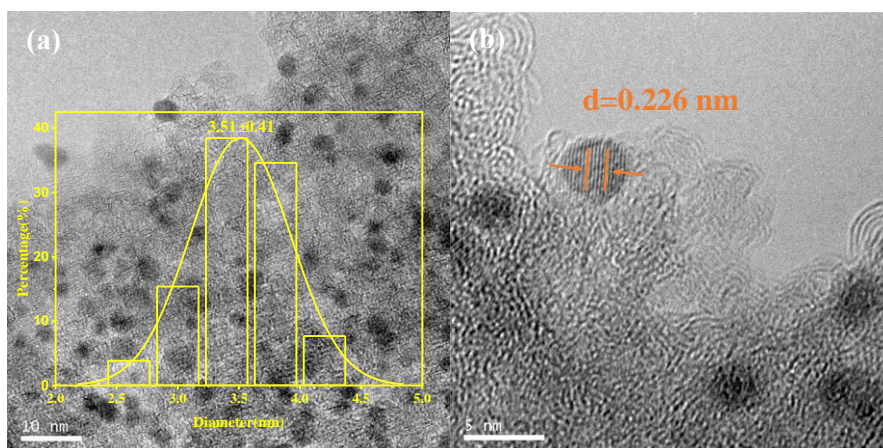

**Fig. S7** TEM images of (a, b) commercial Pd/C. Inset shows the particle size distribution



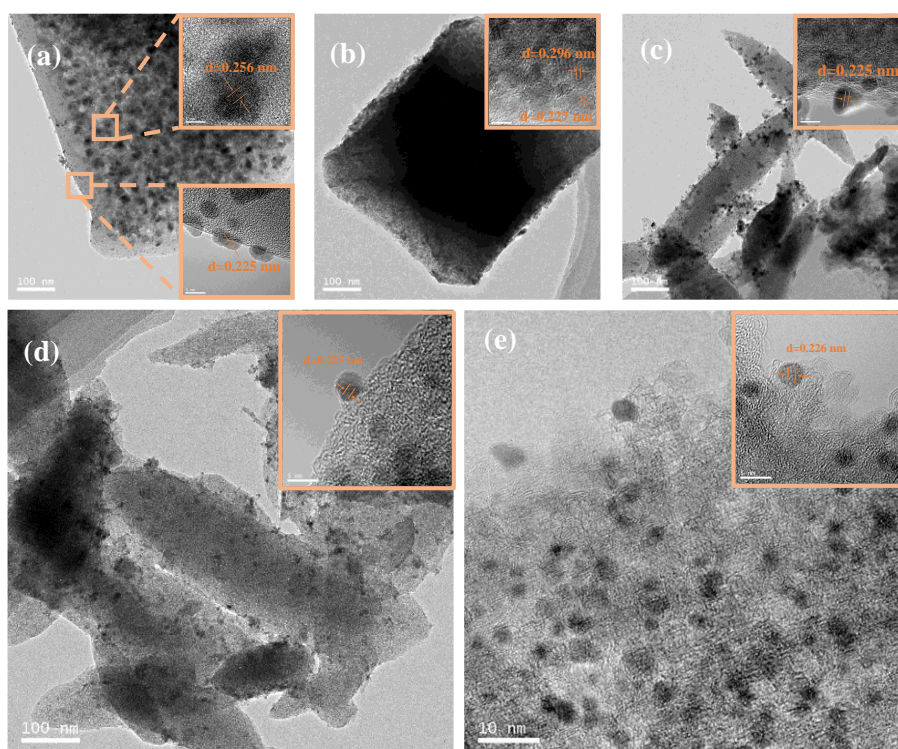

**Fig. S8** TEM images of (a) Pd/MnO/C-800, (b) Pd/ZrO<sub>2</sub>/C-800, (c) Pd/VO<sub>x</sub>/C-600, (c) Pd/VO<sub>x</sub>/C-700, (d) Commercial Pd/C

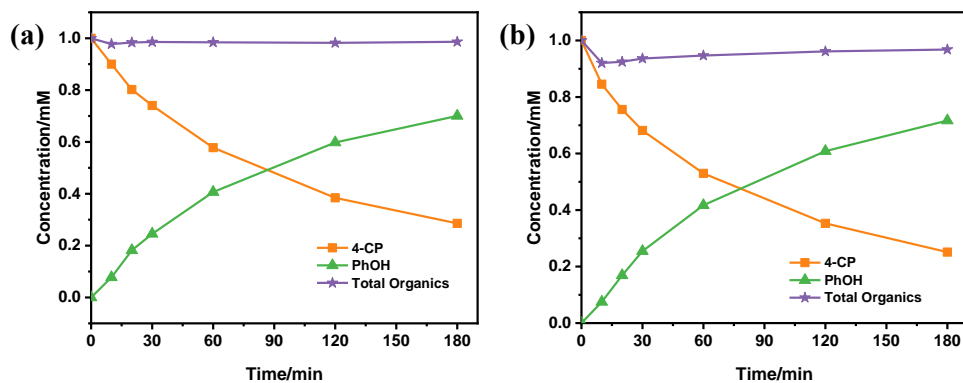

**Fig. S9** Electrocatalytic hydrodechlorination product selectivity of (a) Pd/VO<sub>x</sub>/C-500 and (b) Pd/VC/C-900. Reaction conditions: T = 30 °C, electrolyte: 30 mL PBS solution, concentration of 4-CP = 1 mM, N<sub>2</sub> atmosphere

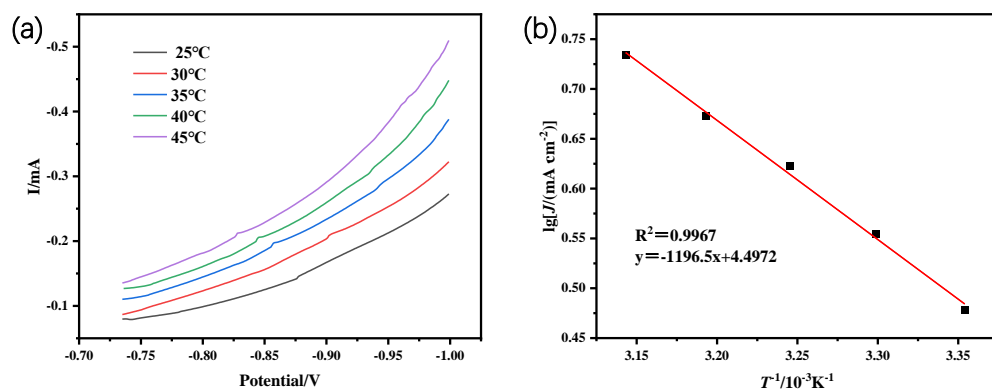

**Fig. S10** Cathodic polarization curves of Pd/VO<sub>x</sub>/C-700 electrode in 30 mL pH=7 100 mM PBS with 5.0 mM 4-CP under different temperatures (a) and relationship between lgJ and 1/T (b)

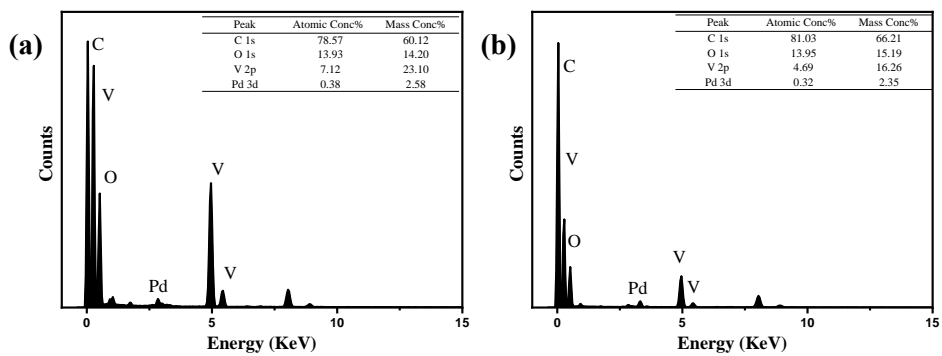

**Fig. S11** TEM-EDS analysis of (a) Pd/VO<sub>x</sub>/C-700-before (powder sample) and (b) Pd/VO<sub>x</sub>/C-700-after

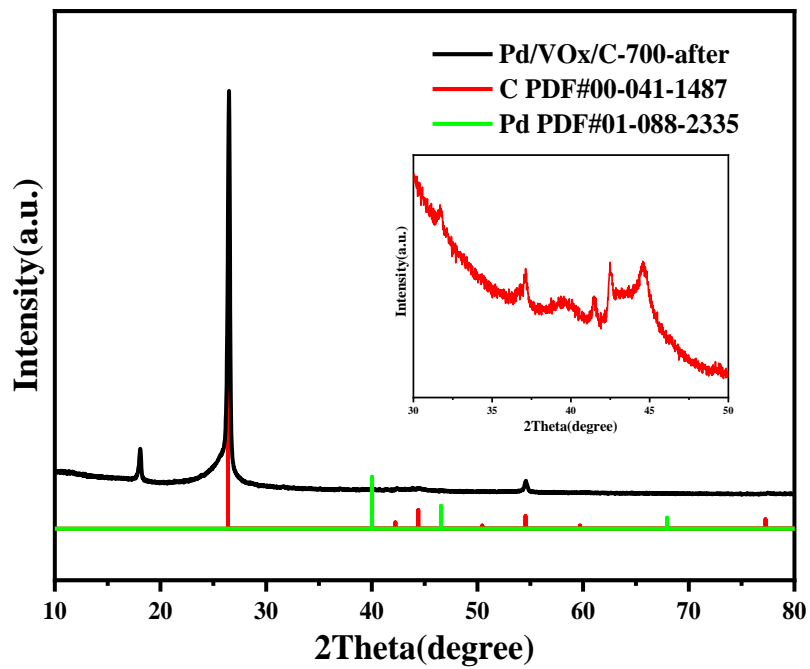

Fig. S12 XRD of Pd/VO<sub>x</sub>/C-700 after cycle test

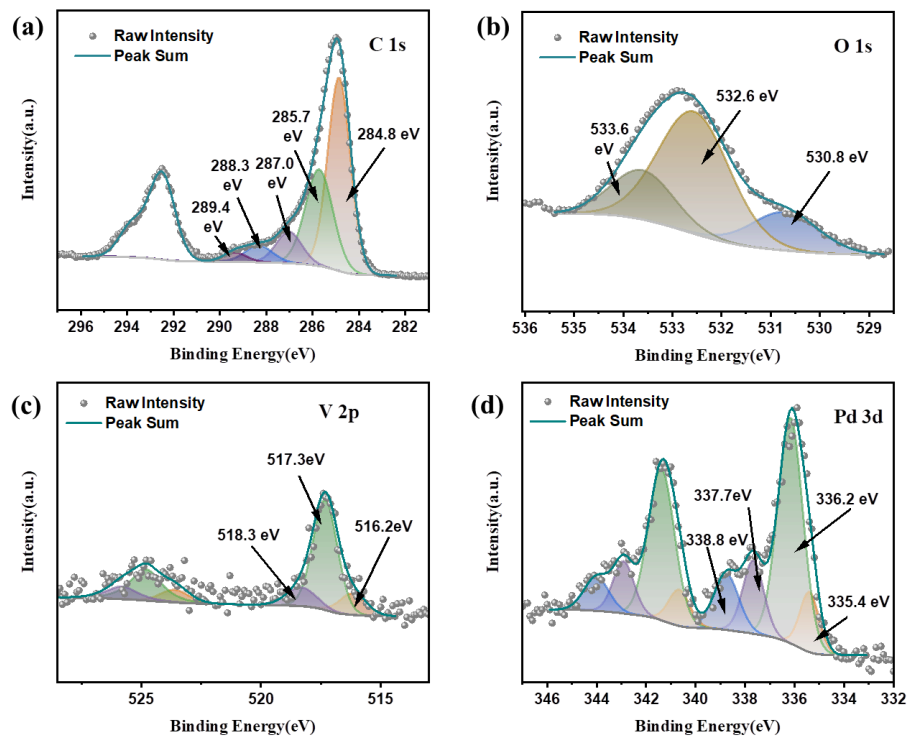

**Fig. S13** XPS of (a) C 1s, (b) O 1s, (c) V 2p and (d) Pd 3d for Pd/VOx/C-700 after cycle test

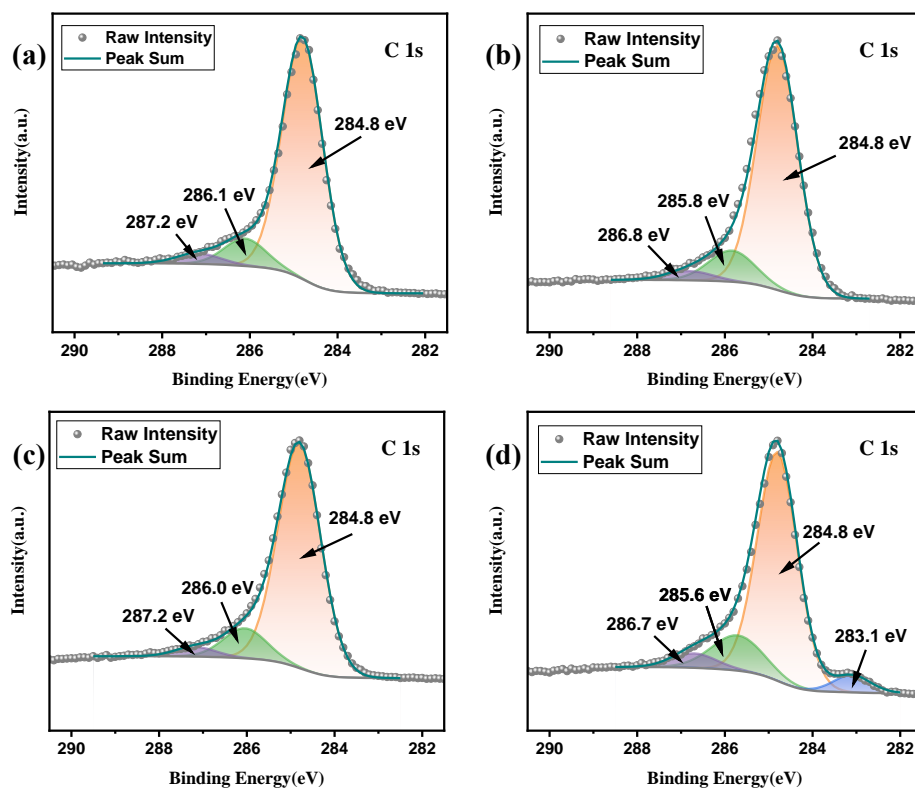

**Fig. S14** C 1s XPS spectra of (a) commercial Pd/C, (b) Pd/VO<sub>x</sub>/C-500, (c) Pd/VO<sub>x</sub>/C-700, (d) Pd/VC/C-900

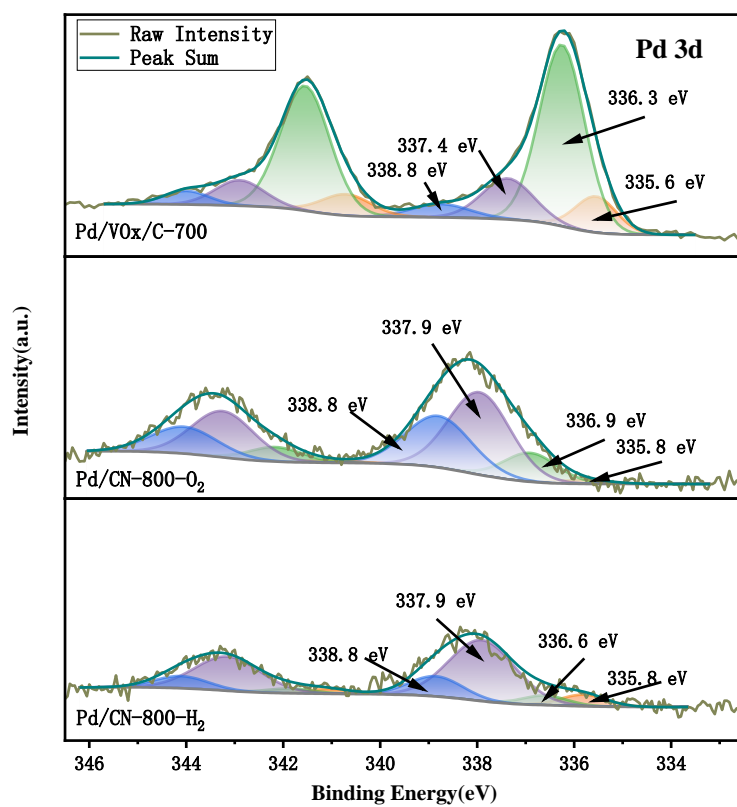

**Fig. S15** Pd 3d region in Pd/VO<sub>x</sub>/C-700, Pd/CN-800-O<sub>2</sub> and Pd/CN-800-H<sub>2</sub>



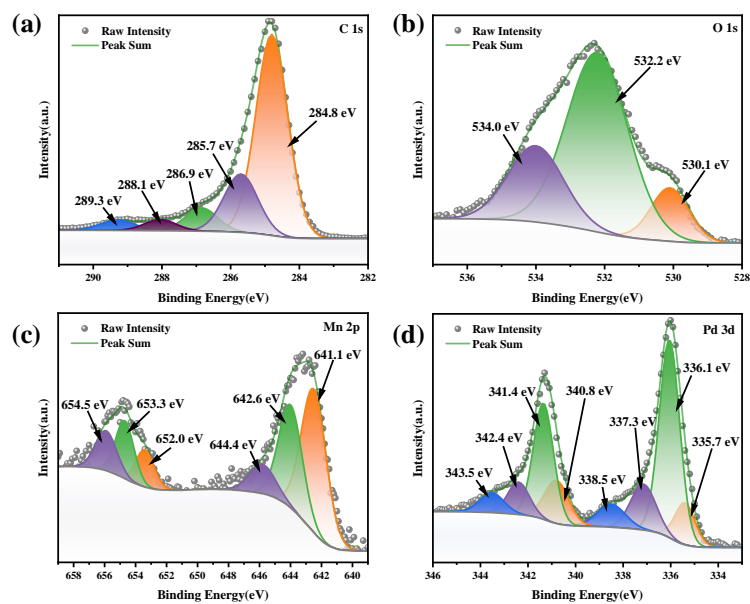

**Fig. S16** (a) C 1s, (b) O 1s, (c) Mn 2p and (d) Pd 3d XPS spectra of Pd/MnO/C-800

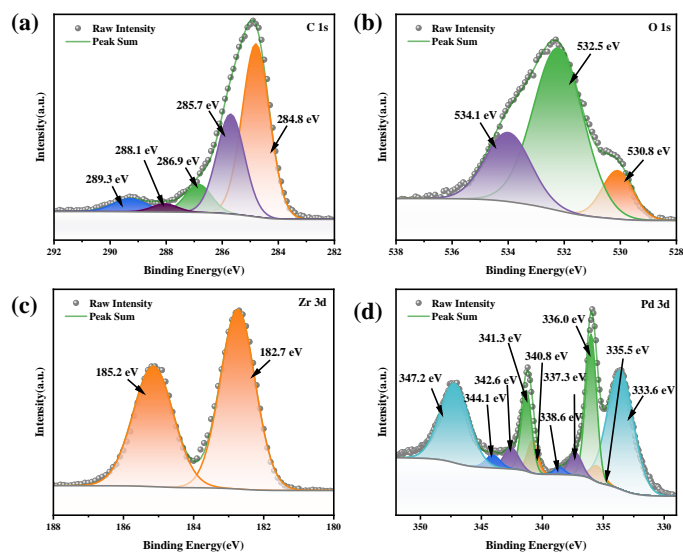

**Fig. S17** (a) C 1s, (b) O 1s, (c) Zr 3d and (d) Pd 3d XPS spectra of Pd/ZrO<sub>2</sub>/C-800

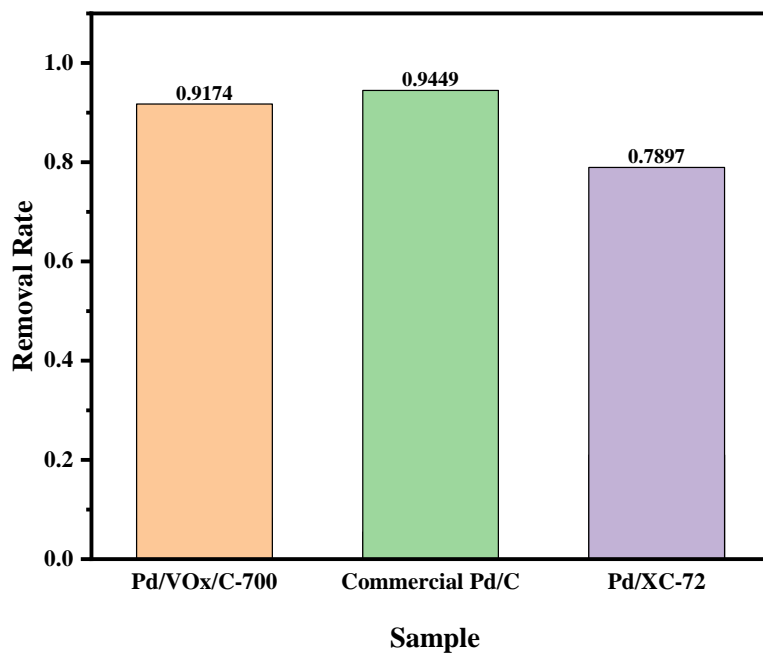

**Fig. S18** EHDC performance of Pd/VOx/C-700,commercial Pd/C and Pd/XC-72

**Table S1.**  $k_{ap}$  and the normalized  $k_{ap}$  for EHDC of 4-CP on Pd-based catalysts supported by different oxides

| Pd-based catalysts         | $k$ ( $\text{min}^{-1}$ ) | $R^2$  | ECSA ( $\text{cm}^2$ ) | normalized $k_{ap}$ ( $\text{min}^{-1} \cdot \text{cm Pd}^{-2}$ ) |
|----------------------------|---------------------------|--------|------------------------|-------------------------------------------------------------------|
| Pd/MnO/C-800               | 0.00332                   | 0.9530 | 2.6707                 | 0.00123                                                           |
| Pd/ZrO <sub>2</sub> /C-800 | 0.00750                   | 0.9812 | 1.6359                 | 0.00458                                                           |
| Pd/VO <sub>x</sub> /C-600  | 0.01170                   | 0.9960 | 1.2108                 | 0.00966                                                           |
| Commercial Pd/C            | 0.01595                   | 0.9984 | 2.3963                 | 0.00666                                                           |

**Table S2.** Activity comparison of Pd/VO<sub>x</sub>/C-700 with representative nano-Pd and Pd film electrocatalysts for the dichlorination of chlorophenol

| Cathode                      | electrolytes                           | Concentration of Reactant(4-CP) | Pd loading (mg/cm <sup>2</sup> ) | DA <sup>a</sup> (mmol·g <sup>-1</sup> ·h <sup>-1</sup> ) | Main product <sup>b</sup> | Refs      |
|------------------------------|----------------------------------------|---------------------------------|----------------------------------|----------------------------------------------------------|---------------------------|-----------|
| Pd-P -60                     | 25 mM K <sub>2</sub> SO <sub>4</sub>   | 0.38 mM                         | 0.08                             | 10.8                                                     | phenol                    | 1         |
| Pd/PPy-rGO/ Ni foam          | 100 mM Na <sub>2</sub> SO <sub>4</sub> | 0.78 mM                         | 0.43                             | 24.7                                                     | phenol                    | 2         |
| Pd/Ni <sub>2</sub> P-NF      | 50 mM Na <sub>2</sub> SO <sub>4</sub>  | 0.38 mM                         | 0.41                             | 9.0                                                      | phenol                    | 3         |
| Pd/rGO/ Ni foam              | 50 mM Na <sub>2</sub> SO <sub>4</sub>  | 1 mM                            | 2.6                              | 36.1                                                     | phenol                    | 4         |
| A-Pd-NC/CP                   | 100 mM PBS                             | 1 mM                            | 0.022                            | 72.0                                                     | phenol                    | 5         |
| TiO <sub>2</sub> @PDA/Pd     | 100 mM PBS                             | 1 mM                            | 0.093                            | 23.9                                                     | phenol                    | 6         |
| Pd/CN-800/CP                 | 100 mM PBS                             | 1 mM                            | 0.051                            | 43.3                                                     | phenol                    | 7         |
| Pd-Cu/PPy/NF                 | 50 mM Na <sub>2</sub> SO <sub>4</sub>  | 1.56 mM                         | 0.265                            | 44.2                                                     | phenol                    | 8         |
| Pd/VO <sub>x</sub> /C-700/CP | 100 mM PBS                             | 1 mM                            | 0.031                            | 72.6                                                     | phenol                    | This work |

<sup>a</sup> Dechlorination activity (DA) was calculated at optimal conditions. <sup>b</sup> The main product at the point of dechlorination reaction where the DA was calculated. PPy-rGO= polypyrrole-reduced graphene oxide.

**Table S3.** Fitted Pd peak areas ratio of Pd/MnO/C-800 and Pd/ZrO<sub>2</sub>/C-800 catalysts  
in XPS

| Catalysts                      | S1=<br>(Pd <sup>0</sup> ) <sup>a</sup> | S2=<br>(Pd <sup>δ+</sup> ) <sup>b</sup> | S3=<br>(Pd <sup>2+</sup> ) <sup>c</sup> | S4=<br>(Pd-Cl) <sup>d</sup> | Sum <sup>e</sup> | (S2+S3)<br>/S1 | S1/<br>Sum | S2/<br>Sum | S3/<br>Sum | S4/<br>Sum |
|--------------------------------|----------------------------------------|-----------------------------------------|-----------------------------------------|-----------------------------|------------------|----------------|------------|------------|------------|------------|
| Pd/MnO/C<br>-800               | 5500                                   | 13000                                   | 3600                                    | 2000                        | 24100            | 3.02           | 22.82      | 53.94      | 14.94      | 8.30       |
| Pd/ZrO <sub>2</sub> /C<br>-800 | 2500                                   | 18800                                   | 3500                                    | 900                         | 25700            | 8.92           | 9.73       | 73.15      | 13.62      | 3.50       |

<sup>a</sup> The Fitted peak areas of Pd<sup>0</sup>. <sup>b</sup> The Fitted peak areas of Pd<sup>δ+</sup> (0 < δ < 2). <sup>c</sup> The Fitted peak areas of Pd<sup>2+</sup>. <sup>d</sup> The Fitted peak areas of Pd-Cl. <sup>e</sup> The total Fitted Pd peak area

1. Y. Chen, Z. Liu, S. Liu, Y. Cheng, C. Zhang, J. Jiao, Y. Lu, W. Wang, K. Sun, X. Bi, A. Han, B. Liu, Y. Pan, Y. Liu and C. Liu, *Appl. Catal., B*, 2021, **284**.
2. H. Yu, S. Yang, B. Zhao, Y. Lu, S. Zhu, X. Wang, W. Qin and M. Huo, *J. Electroanal. Chem.*, 2020, **869**, 114099.
3. J. Li, Y. Chen, R. Bai, C. Chen, W. Wang, Y. Pan and Y. Liu, *Chem. Eng. J.*, 2022, **435**, 134932.
4. Y. Liu, L. Liu, J. Shan and J. Zhang, *J. Hazard. Mater.*, 2015, **290**, 1-8.
5. Z. Mao, L. Liu, H. B. Yang, Y. Zhang, Z. Yao, H. Wu, Y. Huang, Y. Xu and B. Liu, *Electrochim. Acta*, 2021, **391**, 138886.
6. Z. Zhao, L. Yu, L. Zheng, T. Guo, Z. Lv, S. Song and H. Zheng, *J. Hazard. Mater.*, 2022, **435**, 128998.
7. S. Xu, B. Mei, F. Li, J. Mao, C. Huang, Y. Yan, N. Chen, Y. Xu and M. Shi, *Nanotechnology*, 2023, **34**, 445601.
8. Y. Lei, T. Li, L. Yang, Y. Peng, W. Xiong and D. Liu, *Appl. Surf. Sci.*, 2024, **654**, 159479.
